1 Title: **Survival of hatchery grown native oysters is associated with specific gut-associated**  
2 **bacteria at various locations within the Puget Sound**

3  
4 Authors: Emily Kunselman<sup>1\*</sup>, Jeremiah J Minich<sup>2</sup>, Micah Horwith<sup>3</sup>, Jack A Gilbert<sup>1,4,5</sup>, Eric E  
5 Allen<sup>1,5,6</sup>

6 <sup>1</sup>Center for Marine Biotechnology and Biomedicine, Scripps Institution of Oceanography,  
7 University of California San Diego, La Jolla, CA, USA

8 <sup>2</sup>Plant Molecular and Cellular Biology Laboratory, The Salk Institute of Biological Studies, La  
9 Jolla, CA, USA

10 <sup>3</sup>Washington State Department of Ecology, Seattle, WA, USA

11 <sup>4</sup>Department of Pediatrics, School of Medicine, University of California San Diego, La Jolla, CA,  
12 USA

13 <sup>5</sup>Center for Microbiome Innovation, University of California San Diego, La Jolla, California, USA

14 <sup>6</sup>Molecular Biology Section, Division of Biological Sciences, University of California San Diego, La  
15 Jolla, CA, USA

16 \*corresponding author

17 *Abstract*

18 The Olympia oyster (*Ostrea lurida*) of the Puget Sound suffered a dramatic population crash,  
19 but restoration efforts hope to revive this native species. One overlooked variable in the  
20 process of assessing ecosystem health is association of bacteria with marine organisms and the  
21 environments they occupy. Oyster microbiomes are known to differ significantly between  
22 species, tissue type, and the habitat in which they are found. The goals of this study were to  
23 determine the impact of field site and habitat on the oyster microbiome and to identify core  
24 oyster-associated bacteria in the Puget Sound. Olympia oysters from one parental family were  
25 deployed at four sites in the Puget Sound both inside and outside of eelgrass (*Zostera marina*)  
26 beds. Using 16S rRNA gene amplicon sequencing of the oyster gut, shell, surrounding seawater  
27 and sediment, we demonstrate that gut-associated bacteria are distinct from the surrounding  
28 environment and vary by field site. Furthermore, regional differences in the gut microbiota are  
29 associated with the survival rates of oysters at each site after two months of field exposure.  
30 However, habitat type had no influence on microbiome diversity. Further work is needed to  
31 identify the specific bacterial dynamics that are associated with oyster physiology and survival  
32 rates.

33  
34 *Importance*

35 The outcomes of this study demonstrate the need to monitor microbial ecology at potential  
36 oyster restoration sites, specifically for the native Olympia oyster in the Puget Sound. Some  
37 areas of Puget Sound may be less amenable to Olympia oyster restoration than others due to  
38 microbiome colonization trends. Furthermore, this study puts the oyster microbiome in the  
39 context of its surroundings, providing a holistic perspective on the factors that may influence  
40 oyster performance and microbial ecology.

41  
42 *Introduction*

43 Invertebrate microbiology research is increasingly important in the face of environmental and  
44 anthropogenic change. Olympia oyster (*Ostrea lurida*) populations declined across their native  
45 range on the west coast of the United States due to overharvesting by humans in the late 1900s  
46 (Peter-Contesse and Peabody 2005). The loss of the Olympia oysters poses a threat to  
47 ecosystem services, as oysters create structured habitat and filter surrounding water (Peter-  
48 Contesse and Peabody 2005). Recovery of these valuable services could be achieved through  
49 restoration efforts. To improve restoration outcomes, it is essential to identify where juvenile  
50 oysters will survive and grow successfully. Environmental and host-associated microbiota can  
51 impact settlement and growth in marine invertebrates (Wang et al. 2012; Nielsen, Harder, and  
52 Steinberg 2015; Dobretsov and Rittschof 2020), but the impact of microbial communities on the  
53 survival and growth of Olympia oysters in particular is unknown. Here, we explore the  
54 connection between Olympia oyster performance and associated microbiota through a field  
55 experiment in Puget Sound, Washington (USA).

56  
57 Temperature, dissolved oxygen, salinity, and carbonate chemistry can limit oyster growth,  
58 metabolism, and survival (Burge et al. 2007; Dickinson et al. 2012; Keppel, Breitburg, and  
59 Burrell 2016), and may therefore limit restoration success. Alone or in tandem, environmental  
60 conditions can stress oysters and make them more susceptible to disease (Burge et al. 2007;  
61 Elizabeth H. Silvy, Frances P. Gelwick, and Nova J. Silvy 2020). Stress is also likely to directly or  
62 indirectly impact the microbiome of the oyster, as microbes are either exposed to the same  
63 environmental conditions or are dependent on the host's stress response (Lokmer and Mathias  
64 Wegner 2015; Scanes et al. 2021; Coffin et al. 2021). A core microbiota has been demonstrated  
65 for oysters (G. M. King et al. 2012; W. L. King et al. 2020; Trabal et al. 2012), but microbiota also  
66 vary significantly depending on environmental conditions and on the geographic location of the  
67 host (Lokmer and Mathias Wegner 2015; G. M. King et al. 2012; Pierce et al. 2016; W. L. King et  
68 al. 2020; Khan et al. 2018; Scanes et al. 2021). A disturbance of the oyster microbiome may  
69 have consequences for host health, as one study suggests that the oyster microbiome can  
70 exhibit antimicrobial properties (Desriac et al. 2014).

71  
72 In this study, we evaluated the microbial diversity associated with the native Olympia oyster by  
73 comparing environmental and host-associated microbiota to identify differences across field  
74 sites and habitats and connections with oyster performance. The study aimed to: (i)  
75 characterize core or consistent members of the Olympia oyster microbiome, independent of  
76 other factors and (ii) assess the extent of microbial variation across space. Methodologically,  
77 oysters were outplanted from a hatchery to field sites either inside or outside of eelgrass beds,  
78 left in place for two months, and then dissected and processed for bacterial community  
79 analysis. The field sites and habitats were further characterized by physicochemical parameters  
80 and assessment of the environmental microbiome.

81  
82 *Materials and Methods*

83  
84 Sampling

85 Juvenile Olympia oysters (~1 year old) were collected from the hatchery at the Kenneth K. Chew  
86 Center for Shellfish Research in Manchester (Washington, USA) and distributed to 4 field sites

87 throughout Puget Sound in June of 2018 and retrieved 2 months later in August 2018 (**Fig. 1**). At  
88 each of the 4 field sites, one PVC mesh oyster cage was deployed in the center of a patch of  
89 eelgrass (*Zostera marina*) habitat and another cage was deployed in the center of a patch of  
90 unvegetated habitat. The 1 cm mesh-size cages were intended to exclude predators while  
91 allowing circulation. Each cage was anchored to a PVC post and contained 10 oysters upon  
92 deployment. A 'patch' of eelgrass habitat was defined as an area at least 6 m in diameter with  
93 at least 60 shoots per square meter, and a 'patch' of unvegetated habitat was defined as an  
94 area at least 6 m in diameter with no eelgrass present. The centroid of all patches was located  
95 at a tidal elevation between -0.3 m and -1 m MLLW. Cages were cleaned of biofouling  
96 organisms and debris every two weeks during the deployment.

97  
98 Upon retrieval, 3 water samples and 3 sediment samples were taken from the area around each  
99 oyster cage (n = 6 water and 6 sediment samples per site). At Case Inlet, only 3 water samples  
100 were taken (n = 2 inside eelgrass beds and n = 1 outside eelgrass) due to a shortage of bottles in  
101 the field. Water samples were collected within 3 m of each oyster cage on an ebbing tide,  
102 when the water column was approximately 1 m deep. Samples were collected in acid-washed  
103 Nalgene bottles with mesh filters over the opening. The bottle was dipped below the surface of  
104 the water while wearing gloves and kept underwater until nearly full. Sediment samples were  
105 collected in 15 mL Falcon tubes by opening the tubes at the top of the sediment, sweeping the  
106 tube opening across the top 1 inch of sediment and then pouring out excess water before  
107 capping. Oyster cages were then retrieved and transported to the laboratory in cool, dark and  
108 dry conditions.

109  
110 In the laboratory at the University of Washington, oyster shells were lightly scrubbed with  
111 sterile toothbrushes to remove mud and left to dry for a few minutes. Biofilm samples were  
112 collected from three oysters in each cage by swabbing back and forth across the entirety of the  
113 shell surface on one side. Swab tips were removed, placed in individual 1.5mL vials,  
114 immediately frozen in a dry ice bath, and then stored at -80°C. Shell length was recorded for all  
115 oysters after swabbing to prevent cross contamination. Living oysters were then shucked using  
116 a sterile scalpel. Complete stomach and digestive tissue were removed using a newly sterilized  
117 scalpel blade, flash frozen, and then stored at -80°C. For each oyster cage, survival was  
118 recorded as the proportion of living oysters remaining out of ten.

119  
120 Sediment samples were stored at -80°C upon arrival at the laboratory, and water samples were  
121 filtered over 0.2 µm-pore size cellulose filters using vacuum filtration. The filters were folded  
122 and dropped into Powerbead tubes from the Qiagen DNeasy Powersoil Kit and stored at -80°C.

#### 123 124 Environmental Data Collection

125 PME miniDOT sensors (for temperature and dissolved oxygen data) and Odyssey conductivity  
126 loggers (for salinity data) were deployed alongside oyster cages in eelgrass habitat and in  
127 unvegetated habitat at each site. Instruments logged at 10-minute intervals from early June to  
128 late August 2018. Measurements collected when the predicted tidal elevation was lower than 0  
129 m MLLW were excluded to eliminate data collected during immersion. Dissolved oxygen data  
130 were adjusted based on salinity and reported in mg\*L<sup>-1</sup>.

131

132 To assess relative differences between habitats and between field sites, temperature, and  
133 dissolved oxygen data from the 24 hours immediately prior to collection was analyzed. Due to  
134 salinity sensors failing at 3 sites during this 24-hour period, no statistical tests were run to  
135 compare salinity data across site and habitat. A permutational two-way ANOVA for repeated  
136 measurements was run to account for repeated measures from the same sensors at the same  
137 sites over time (Kherad-Pajouh and Renaud 2015). This data did not follow a normal  
138 distribution, and therefore the permutational ANOVA approach was used. The interaction  
139 between site and habitat was also explored when assessing differences in the environmental  
140 data.

141

#### 142 DNA Extraction, Amplification and Sequencing

143 Following the Earth Microbiome Project protocols, DNA was extracted from all sample types  
144 using the single tube Qiagen DNeasy Powersoil Kit. Single tube extractions, although more time  
145 consuming, reduce the amount of well-to-well contamination (Minich et al. 2019). Extracted  
146 DNA was shipped over dry ice to Scripps Institution of Oceanography and stored at -20°C. DNA  
147 was amplified following the 16S rRNA gene Illumina amplicon protocol provided by the Earth  
148 Microbiome Project (Caporaso et al. 2012). Primers 515F and 806R were used to target the V4  
149 region of the 16S rRNA gene and sequenced on the Illumina MiSeq platform to produce 250  
150 base pair forward and reverse reads.

151

#### 152 Sequence Analysis

153 Resulting sequence data were uploaded to Qiita (Gonzalez et al. 2018) [Qiita ID 12079] and  
154 demultiplexed, trimmed to 150 base pairs and erroneous sequences were removed using the  
155 Deblur workflow positive filter (Amir et al. 2017). The deblur final table was exported to Qiime2  
156 (Bolyen et al. 2019) and used for all subsequent analyses. Alpha diversity across sample types  
157 was assessed by Shannon diversity index (C. E. Shannon 1948), which measures evenness within  
158 given sample types (**Fig 2**). Significance of alpha diversity across groups was conducted with a  
159 Kruskal-Wallis test. Beta diversity was analyzed via Bray Curtis (Bray and Curtis 1957), weighted  
160 and unweighted UniFrac (Lozupone, Hamady, and Knight 2006; McDonald et al. 2018), and  
161 Qiime2's DEICODE RPCA (Martino et al. 2019) method with a sampling depth of 1,920.  
162 Phylogenetic tree derivation for UniFrac was performed using an insertion tree with the  
163 fragment insertion sepp function in Qiime2 (Janssen et al. 2018). Permanova tests for all beta  
164 diversity metrics were run in Qiime2 (Anderson 2001). RPCA was chosen for presentation  
165 because this method does not use pseudocounts and is therefore termed a more robust version  
166 of the Aitchison's distance metric (**Fig 2**). Taxonomy was assigned in Qiime2 against the Silva  
167 database v.138 (Quast et al. 2012; Yilmaz et al. 2014). The biom table and taxonomy was  
168 downloaded from Qiime2 and reconstructed in R using the program Qiime2R. The taxonomy  
169 bar plots and heat maps were generated in R (**Fig 3**), alongside the alpha diversity boxplot in  
170 Figure 2. All samples that were retained through the Deblur workflow are presented in the  
171 taxonomy plots in Figure 3. The heatmap encompasses sediment, water, biofilm, and oyster  
172 gut samples, while the bar plot was generated using only oyster gut samples. For oyster gut  
173 samples, beta diversity indices were performed at a sampling depth of 1000 because these

174 samples had lower biomass than other sample types and this depth allowed more gut samples  
175 to be retained in the analysis.

176

## 177 *Results*

178 Oyster survival was highest at Case Inlet and Fidalgo Bay and lowest at Skokomish and Port  
179 Gamble (**Fig. 1**). Survival in eelgrass beds (77.5%) was slightly higher than that of unvegetated  
180 habitat (67.5%). Alpha and beta diversity analyses were conducted on habitat type (eelgrass  
181 habitat versus unvegetated habitat) with considerations for nestedness. For alpha diversity, an  
182 ANOVA was run on habitat type and showed no interactions with geographic location or sample  
183 type, although assumptions of normal distribution were violated to test this effect. For beta  
184 diversity, adonis was run on habitat type, which was nested within each site and across sample  
185 types. Overall, no significant differences in alpha diversity or beta diversity among all samples  
186 were observed between habitats (Shannon ANOVA,  $F = 0.002$ ,  $p = 0.962$ ; Unweighted UniFrac  
187 Adonis,  $F = 1.257$ ,  $p = 0.123$ ). For this reason, habitat type was not considered for subsequent  
188 analyses.

189

190 Temperature was significantly different across the sites, but did not vary between eelgrass and  
191 unvegetated habitat (permANOVA by site,  $F = 411.47799$ ,  $p = 0.0002$ , permANOVA by habitat,  $F$   
192  $= 0.33596$ ,  $p = 0.5626$ ). Dissolved oxygen also varied significantly across site but not between  
193 habitats (permANOVA by site,  $F = 258.9586$ ,  $p = 0.0002$ , permANOVA by habitat,  $F = 0.9197$ ,  $p =$   
194  $0.3266$ ). There were no interactions between site and habitat when comparing temperature or  
195 dissolved oxygen. These data were plotted by site and habitat and the Skokomish site showed  
196 the lowest values overall for both temperature and dissolved oxygen (**Fig. 1**).

197

198 Alpha diversity (Shannon's index) was significantly different (Kruskal-Wallis,  $H = 95.084$ ,  $p =$   
199  $1.77 \times 10^{-20}$ ; pairwise tests all showed  $p < 0.001$ ) between sample types (**Fig. 2**), whereby biofilm  
200 and marine sediment host a higher diversity of bacterial taxa compared to seawater and oyster  
201 gut (**Fig. 2**). While oyster gut samples were found to host the lowest diversity of bacteria, they  
202 also manifest the greatest range in alpha diversity, suggesting that some samples were higher  
203 in richness and evenness than others (**Fig. 2**). RPCA analysis of beta diversity concluded that  
204 sample types varied significantly from one another in composition (Permanova,  $F = 124.862$ ,  $p =$   
205  $0.001$ ; **Fig. 2**). Looking at pairwise comparisons in Shannon distance between each sample type,  
206 gut samples were closest in similarity to the biofilm samples ( $\bar{x}_{\text{distance}}=1.68$ ,  $p < 0.001$ ), followed  
207 by sediment samples ( $\bar{x}_{\text{distance}}=2.14$ ,  $p < 0.001$ ), and furthest in distance from seawater samples  
208 ( $\bar{x}_{\text{distance}}=2.30$ ,  $p < 0.001$ ).

209

210 Taxonomic alignment of bacteria ASVs reveals relative abundances of key taxa groups within  
211 each sample type (**Fig. 3**). Taxonomic assignment of ASVs identified across samples  
212 demonstrates that *Mycoplasma* sp. dominates the oyster gut samples compared to any other  
213 sample type, which mostly lack *Mycoplasma* spp. (**Fig. 3**). A large proportion of gut samples  
214 contain an unidentified ASV in relatively high abundance. This ASV was blasted against the NCBI  
215 16S rRNA gene database to assess the nature of this sequence. The ASV was found to be only  
216 87% similar to the closest match, which is *Nitrosomonas marina*. When placed in a phylogenetic  
217 tree, the ASV falls within a large group of Proteobacteria. This ASV was not filtered out of the



218 dataset during mitochondrial and chloroplast sequence exclusion and insertion tree placement,  
219 therefore, it is unlikely to be a eukaryotic sequence.

220

221 RPCA analysis was conducted once again, but after filtering out all sediment, seawater, and  
222 shell biofilm samples to include oyster gut samples only. DEICODE RPCA in Qiime2 was applied  
223 to the gut samples at a sampling depth of 1000 to further investigate the differences within  
224 oysters across field sites (**Fig 4**) (Martino et al. 2019). After confirming significant variation  
225 across sites (Permanova,  $F = 10.6534$ ,  $p = 0.001$ ; **Fig. 4**) and using DEICODE to identify ASVs  
226 driving differences across sites, Songbird differential abundance analysis was performed to rank  
227 the differentials of every ASV across field sites (Morton et al. 2019). Using Qurro, a visualization  
228 tool for the differentials generated by Songbird (Fedarko et al. 2020), ratios of the driving taxa  
229 were generated for the boxplot in Figure 4 and values were organized by site. DEICODE and  
230 Songbird differentials can both be viewed in Qurro, but Songbird models are trained on  
231 metadata variables of interest and therefore the predictive accuracy of the model is directly  
232 related to the metadata variables included in the model's formula. The Songbird model that  
233 was generated with a formula of field site outperformed the null model with a  $Q^2$  score of 0.17.  
234 For the ratio, groups of ASVs assigned to *Vibrio*, *Synechococcus* and Verrucomicrobiales were  
235 clustered because they were heavily associated with oysters in the Port Gamble and Skokomish  
236 sites. ASVs assigned to *Mycoplasma* and Desulfocapsaceae were clustered because they  
237 appeared to drive the separation of the Fidalgo Bay oyster samples from other gut samples. 7  
238 samples were dropped from the Qurro visualization because one or more zeros were present in  
239 the differential ratio, which suggests that these samples did not contain the ASVs identified in  
240 the equation. The comparison of relative abundances of a single taxon across samples can be  
241 misleading because its value within each sample depends on the abundance of all other taxa  
242 within that sample. To avoid this issue, one taxon is chosen as a reference and differentials of  
243 the other taxa are compared to this reference. This allows inference of the taxa's true change in  
244 relative abundance from one site to the next. *Mycoplasma* spp. were chosen as the reference  
245 because this group is found in the majority of gut samples, allowing for a consistent comparison  
246 of other groups from one site to the next. The "identify core features" command was used to  
247 identify ASVs present in over 75% of gut samples, one of which was a *Mycoplasma* ASV. After  
248 the differentials of specific taxa are grouped into the ratio, with the reference group in the  
249 denominator, the natural log is taken, and these values are plotted in Figure 4.

250

251 *Mycoplasma* and Desulfocapsaceae ASVs were at greater proportions in the samples at Fidalgo  
252 Bay than *Vibrio*, Verrucomicrobiales, and *Synechococcus* ASVs. Port Gamble and Skokomish  
253 demonstrated the opposite trend: *Vibrio*, Verrucomicrobiales, and *Synechococcus* ASVs were at  
254 a greater proportion than *Mycoplasma* and Desulfocapsaceae ASVs. Case Inlet represents a  
255 middle ground, where the ratio fluctuates around 0 to show that these specific ASVs were  
256 overall fairly equal in abundance for the group of samples from this site. While this ratio does  
257 not come from absolute abundances and therefore, we cannot define the midpoint of the x-  
258 axis, the use of reference points from the differential abundance analysis confirms the  
259 observation that these taxa explain variation between sites. The natural log ratio values were  
260 imported into R and run through a Kruskal Wallis nonparametric analysis of variance test and  
261 found to be significantly different across sites ( $H = 33.243$ ,  $p = 2.86 \times 10^{-7}$ ). A post hoc Dunn test

262 was also run to confirm the specific differences across sites, and all were significantly different  
263 from one another except Port Gamble and Skokomish. This can be seen in Figure 4 as the  
264 boxplots heavily overlap between these sites. Additional tests were performed on the log ratios  
265 to determine whether environmental variables also drove differences in these key taxa. Linear  
266 models were created to test the correlation between the log ratios of the above taxa and the  
267 mean values for temperature or dissolved oxygen over the 24 hours prior to collection for each  
268 site and habitat. Neither of these linear models showed significant correlations of  
269 environmental conditions with the oyster-associated bacteria (linear regression correlation and  
270 p values:  $R^2_{\text{temperature}} = -0.009721$ ,  $p_{\text{temperature}} = 0.4709$ ;  $R^2_{\text{DO}} = 0.02157$ ,  $p_{\text{DO}} = 0.1557$ ).

271

272 In summary, Port Gamble and Skokomish experienced the highest overall mortality and highest  
273 fraction of *Vibrio*, *Verrucomicrobiales*, and *Synecochoccus*.

274

### 275 *Discussion*

276 *Olympia* oysters in Puget Sound are a focal species for conservation and restoration science,  
277 due to the dramatic decline in population numbers from historical overfishing and failure of  
278 recovery efforts (Peter-Contesse and Peabody 2005; Jacqueline White, Jennifer L. Ruesink, and  
279 Alan C. Trimble 2009). This field study found significant differences in *Olympia* oyster survival  
280 and microbiome between field sites (**Fig. 1**), suggesting that some locations in Puget Sound may  
281 be more amenable to restoration than others. Temperature and dissolved oxygen were also  
282 significantly different across field sites. Upon further inspection, these variables only changed  
283 across sites and not between habitat types within those sites. There were also no differences  
284 within microbiome communities across the different habitats and no association between  
285 eelgrass habitat and oyster survival. The distance between eelgrass and unvegetated habitat at  
286 each site was minimal compared to geographic separation of the sites and leads to the  
287 conclusion that site characteristics were more impactful than microscale habitat changes.

288

289 Microbial communities showed significant variation across sample types: seawater, marine  
290 sediment, oyster shell biofilm and oyster gut. The gut of the oyster hosted the lowest diversity  
291 of bacteria, which has been demonstrated previously in comparison to the surrounding water  
292 and sediment (Arfken et al. 2017; Offret et al. 2020). Beta diversity analysis suggests that the  
293 gut microbiome was significantly different from the microbiome found on the shell or in  
294 surrounding seawater. There are some shared ASVs between the gut and the surrounding  
295 environment, but these are primarily transient bacteria and the degree to which these bacteria  
296 are functional within the oyster gut is unclear. In another study, the biofilm of the shell of live  
297 and dead oysters was compared and found not to vary, suggesting that the shell microbiome is  
298 not controlled in the same way as the internal oyster tissue microbiota (Arfken et al. 2017).  
299 Previous studies have demonstrated that the community of bacteria within the gut tends to be  
300 more controlled by the host itself than surrounding environmental variables (Pierce and Ward  
301 2019). The ASVs unique to the oyster gut were, in fact, the most prevalent groups in the gut,  
302 creating a specialized microbial community. The oyster gut microbiome is hypothesized to  
303 break down polysaccharides and produce amino acids and vitamins, likely aiding in host  
304 digestion and nutrient absorption (Dubé, Ky, and Planes 2019).

305

306 The most abundant bacteria within the oyster gut cannot be predicted by the environmental  
307 bacterial community or physical variables. In this study, *Mycoplasma* and an unidentified  
308 bacterial group made up a high percentage of the total community and were found in over 75%  
309 of oyster gut samples. *Mycoplasma* is a genus of the Mollicutes class and have been found in  
310 high proportions in various oyster species across a broad geographic range (G. M. King et al.  
311 2012; Offret et al. 2020; Arfken et al. 2017). One study demonstrated that *Mycoplasma* are  
312 likely relying on the oyster to provide certain compounds (Pimentel et al. 2021). The other  
313 highly abundant ASV in the oyster gut did not align to any known bacterial subgroups, which  
314 suggests some potential novelty in the microbiota of oysters. *Synechococcus* were also found in  
315 many of the oyster gut samples, and along with other cyanobacteria are frequently observed in  
316 the oyster gut (Chauhan et al. 2014; Ossai et al. 2017) but are likely sourced from the  
317 environment as they are also found frequently and in high proportions in seawater (Chauhan et  
318 al. 2014). While it is difficult to tease apart resident versus transient and active versus inactive  
319 microbial populations from amplicon sequencing data, the groups identified here come to play  
320 an important role in further analysis.

321  
322 Variation in gut microbiome composition by sites is largely driven by the balance of a few key  
323 taxa. Site-specific characteristics, such as temperature, salinity, and dissolved oxygen, may  
324 influence the abundances of these key taxa. In fact, many studies show significant dissimilarity  
325 in the internal oyster microbiome across growing locations (G. M. King et al. 2012; Trabal et al.  
326 2012; Lokmer, Goedknegt, et al. 2016). However, there is little evidence to suggest the gut  
327 bacteria originate solely from the environment. Some studies see far less variation in the  
328 microbiome across sites (Pierce et al. 2016), but this could depend on how closely the sites are  
329 linked. The microbiome responds strongly to the food ingested by the oysters, and the type of  
330 food available is likely to change across habitats (Simons, Churches, and Nuzhdin 2018). In the  
331 case of this study, the variation can be summarized by the ratio of small groups of taxa across  
332 the sites. A great proportion of *Vibrio*, Verrucomicrobiales and *Synechococcus* in oyster gut  
333 microbiomes are responsible for the separation of Port Gamble and Skokomish from the other  
334 sites. Fidalgo Bay, on the other hand, hosts more of the bacteria that are thought to be core to  
335 the oyster's gut tissue, particularly *Mycoplasma* spp. (G. M. King et al. 2012; Pierce and Ward  
336 2019; Pimentel et al. 2021; Lasa et al. 2019). A previous study on Pacific oysters in the Hood  
337 Canal, Washington identifies Tenericutes (the phylum *Mycoplasma* belong to) and *Vibrio* in  
338 their samples, which matches the Hood Canal sites used in this study, Port Gamble and  
339 Skokomish (Li and Wang 2017). While *Vibrio* may be a common constituent of the oyster  
340 microbiome, it generally makes up only a small percentage of the total community. In the case  
341 of Skokomish, *Vibrio* makes up a larger percentage than expected for a healthy oyster (**Fig 3**). In  
342 Port Gamble, the relative abundance of Verrucomicrobiales and *Synechococcus* is much greater  
343 in gut samples than *Vibrio* (**Fig 3**). The increase in *Vibrio*, which could be opportunistic, and the  
344 reduced presence of other 'core' taxa could potentially be signs of dysbiosis in the oysters at  
345 Skokomish and Port Gamble thus contributing to lower survival rates at these sites.

346  
347 Additional evidence of dysbiosis is that the groups of bacteria which drive differences across  
348 sites fluctuate similarly with respect to survival rate. Ratios of bacteria from Port Gamble and  
349 Skokomish were not statistically different from one another and these sites had the lowest



350 survival rates (55 and 60%, respectively). As stated before, the overrepresentation of *Vibrio* can  
351 be a sign of opportunistic behavior, as normally *Vibrio* are found at very low proportions.  
352 Previous studies focused on stressed oysters suggest that proportions of *Vibrio* similar to those  
353 observed in our study are a sign of infection (Lokmer, Kuenzel, et al. 2016). On the contrary,  
354 *Mycoplasma* is characterized as a core member of the oyster gut in this study and associated  
355 with higher survival. One study found that *Mycoplasma* actually increased in proportion in the  
356 gills of disturbed oysters (Wegner et al. 2013), but as they are normally identified in the gut,  
357 this could be a sign of inappropriate translocation from the gut to more distal tissues,  
358 suggesting physiological disturbance. Therefore, the high prevalence of gut-associated  
359 *Mycoplasma* in our study is unlikely to be a sign of disturbance. Various oyster diseases have  
360 also been linked to imbalance and variation in the oyster microbiome, which can leave oysters  
361 more susceptible to infection (Pimentel et al. 2021; Pathirana et al. 2019; W. L. King, Siboni, et  
362 al. 2019; W. L. King, Jenkins, et al. 2019). In one study, *Mycoplasma* decreased as a result of  
363 infection with the protozoan parasite *Perkinsus marinus* (29)(Pimentel et al. 2021). Pathogens  
364 can also derive from within the oyster, which is the likely case for *Vibrio* species at Port Gamble  
365 and Skokomish. In anoxic conditions, the oyster microbiome may respond to the host stress  
366 response and shift towards an opportunist-dominated community, leading to mortality of the  
367 host, even if it was likely to withstand the anoxic conditions externally (Coffin et al. 2021).  
368 Oysters at Skokomish were collected after a period of very low oxygen compared to the other  
369 sites, suggesting a stressful environment for the oysters and a likely cause for the dominance of  
370 opportunistic *Vibrio* species in the gut microbiome at this site. While the microbiomes of dying  
371 oysters could not be captured in this study, the patterns between survival rate and bacterial  
372 differentials suggest a potential role of these bacteria in oyster mortality, which should be  
373 further tested.

374  
375 The bacterial dynamics are important to consider when monitoring ecosystem health. A diverse  
376 set of microorganisms are better equipped to handle disturbance and outcompete invaders  
377 (Pierce and Ward 2018). Looking at the sites observed in this study, Fidalgo Bay varied greatly  
378 from Port Gamble and Skokomish, which are connected by the Hood Canal. The Fidalgo Bay  
379 oysters fared better than the Hood Canal oysters, which could predict higher likelihood of  
380 recruitment success and survival at Fidalgo Bay, compared to other sites. In fact, Fidalgo Bay  
381 restoration efforts have been very successful and native oyster populations grew from about  
382 50,000 oysters in 2002 to almost 5 million in 2016 (Dinnel 2016). Environmental conditions also  
383 varied in the time leading up to oyster collection, which could influence microbial communities  
384 in the environment and within the oyster. However, the environmental data failed to fully  
385 explain the variation in key bacterial taxa driving the differences across sites. There is no  
386 explanation yet as to why the bacterial communities varied so much or how to evaluate an  
387 optimal microbiome. Other variables that were not assessed in this study can also cause  
388 variation in the microbiome, such as estuary morphology (W. L. King et al. 2020), non-bacterial  
389 disease causing agents (W. L. King, Siboni, et al. 2019; Pathirana et al. 2019; de Lorgeril et al.  
390 2018), and pollutants (Britt et al. 2020); it is possible that these other unknown variables may  
391 be linked to the oyster gut microbiota differences, and may be driving mortality rates.  
392 Transcriptional activity can also vary along environmental gradients and provide more insight  
393 about the behavior of bacteria within the oyster (Stevick, Post, and Gómez-Chiarri 2021). While

394 this type of data was not collected for this study, it will be an important factor to evaluate in  
395 the future.

396  
397 As with any microbiome study, there are limitations in amplicon sequencing and deriving  
398 conclusions from a single time point of environmental data and tissues. Amplicon sequencing  
399 has biases in many steps of the process, from the initial subsampling of tissue to PCR primer  
400 bias. Bacterial proportions were not absolute, which prevents us from declaring that specific  
401 ASVs were increased or decreased from one sample to the next. Moreover, microbiome data  
402 was only collected for one time point in the late summer. A time series of samples or an early  
403 sampling point for comparison may have revealed how the oyster microbiome initially  
404 responded to field conditions and how it changed over time. Temperature, salinity, and  
405 dissolved oxygen variables were explored over the 24 hours prior to collection, but the time of  
406 mortality for any lost oysters was unknown, meaning it was not possible to test association  
407 between these environmental conditions and mortality. Additional constraints required all  
408 oysters to be held in one cage per site and habitat, which could lead to batch effects within the  
409 cages. Additionally, triplicate sediment and seawater samples were taken within close proximity  
410 of one another in order to investigate those communities closest to the oysters, but this likely  
411 led to higher similarity among the individual clusters and did not show a true range of alpha or  
412 beta diversity across the entire site. Considering such limitations, future field sampling efforts  
413 such as this should attempt to limit random and fixed effects as much as possible and collect  
414 widely dispersed samples to capture the full range of variation.

#### 415 416 *Conclusions*

417 Oyster microbiomes have the potential to change because of their environment and/or host  
418 biology. This study demonstrated that while Olympia oyster gut microbiomes varied greatly by  
419 field site, the gut hosts a microbiome distinct from the surrounding environment. The microbial  
420 community was also associated with the survival rates, suggesting a connection between  
421 bacterial composition in the gut and oyster performance. These outcomes have implications for  
422 restoration management of the native Olympia oyster in the Puget Sound, providing critical  
423 insight into the bacterial dynamics faced by oysters recruiting to these sites. This study shows  
424 that some areas of Puget Sound may be less amenable to Olympia oyster restoration than  
425 others, which could guide the direction of restoration efforts. Furthermore, this study takes one  
426 step towards developing microbiome analysis as a diagnostic tool, which could use oyster gut  
427 samples to determine whether a given population is under stress.

#### 428 429 *Data availability*

430 Sequence data generated in this project will be deposited in the EBI-ENA database and made  
431 available through Qiita (Study ID: 12079). Processed data files and scripts for Qiime2 and R are  
432 available in the GitHub Repository (<https://github.com/ekunselman/OlympiaOysterMicrobes>).

#### 433 434 *Acknowledgements*

435 Thank you to Laura H Spencer for providing the oyster spat used in this study. Thank you to the  
436 Dr. Ryan Kelly lab for allowing me to use their lab space for dissection of oysters and

437 extractions. Thank you to the Washington Department of Natural Resources for supplying  
438 extraction kits.

439

440 *Funding*

441 This project was supported by the US National Science Foundation grant OCE-1837116 to E.E.A.  
442 and funding from the Aquatic Assessment and Monitoring Team at the Washington State  
443 Department of Natural Resources.

444 *References*

- 445 Amir, Amnon, Daniel McDonald, Jose A. Navas-Molina, Evguenia Kopylova, James T. Morton,  
446 Zhenjiang Zech Xu, Eric P. Kightley, et al. 2017. “Deblur Rapidly Resolves Single-  
447 Nucleotide Community Sequence Patterns.” Edited by Jack A. Gilbert. *MSystems* 2 (2).  
448 <https://doi.org/10.1128/mSystems.00191-16>.
- 449 Anderson, Marti J. 2001. “A New Method for Non-Parametric Multivariate Analysis of  
450 Variance.” *Austral Ecology* 26 (1): 32–46. <https://doi.org/10.1111/j.1442-9993.2001.01070.pp.x>.
- 452 Arfken, Ann, Bongkeun Song, Jeff S. Bowman, and Michael Piehler. 2017. “Denitrification  
453 Potential of the Eastern Oyster Microbiome Using a 16S rRNA Gene Based Metabolic  
454 Inference Approach.” Edited by Xiangzhen Li. *PLOS ONE* 12 (9): e0185071.  
455 <https://doi.org/10.1371/journal.pone.0185071>.
- 456 Bolyen, Evan, Jai Ram Rideout, Matthew R. Dillon, Nicholas A. Bokulich, Christian C. Abnet,  
457 Gabriel A. Al-Ghalith, Harriet Alexander, et al. 2019. “Reproducible, Interactive, Scalable  
458 and Extensible Microbiome Data Science Using QIIME 2.” *Nature Biotechnology* 37 (8):  
459 852–57. <https://doi.org/10.1038/s41587-019-0209-9>.
- 460 Bray, J. Roger, and J. T. Curtis. 1957. “An Ordination of the Upland Forest Communities of  
461 Southern Wisconsin.” *Ecological Monographs* 27 (4): 325–49.  
462 <https://doi.org/10.2307/1942268>.
- 463 Britt, Adrian, Megan Bernini, Benjamin McSweeney, Sony Dalapati, Sophia Duchin, Kathryn  
464 Cavanna, Nicolette Santos, et al. 2020. “The Effects of Atrazine on the Microbiome of  
465 the Eastern Oyster: *Crassostrea Virginica*.” *Scientific Reports* 10 (1): 11088.  
466 <https://doi.org/10.1038/s41598-020-67851-4>.
- 467 Burge, Colleen A., Linda R. Judah, Loveday L. Conquest, Frederick J. Griffin, Daniel P. Cheney,  
468 Andrew Suhrbier, Brent Vadopalas, Paul G. Olin, Tristan Renault, and Carolyn S.  
469 Friedman. 2007. “Summer Seed Mortality of the Pacific Oyster, *Crassostrea Gigas*  
470 Thunberg Grown in Tomales Bay, CA, USA: The Unfluence of Oyster Stock, Planting  
471 Time, Pathogens, and Environmental Stressors.” *Journal of Shellfish Research* 26 (1):  
472 163–72. [https://doi.org/10.2983/0730-8000\(2007\)26\[163:SSMOTP\]2.0.CO;2](https://doi.org/10.2983/0730-8000(2007)26[163:SSMOTP]2.0.CO;2).
- 473 C. E. Shannon. 1948. “A Mathematical Theory of Communication.” *The Bell System Technical*  
474 *Journal* 27 (3): 379–423. <https://doi.org/10.1002/j.1538-7305.1948.tb01338.x>.
- 475 Caporaso, J Gregory, Christian L Lauber, William A Walters, Donna Berg-Lyons, James Huntley,  
476 Noah Fierer, Sarah M Owens, et al. 2012. “Ultra-High-Throughput Microbial Community  
477 Analysis on the Illumina HiSeq and MiSeq Platforms.” *The ISME Journal* 6 (8): 1621–24.  
478 <https://doi.org/10.1038/ismej.2012.8>.
- 479 Chauhan, Ashvini, Denis Wafula, Dawn E. Lewis, and Ashish Pathak. 2014. “Metagenomic  
480 Assessment of the Eastern Oyster-Associated Microbiota.” *Genome Announcements* 2  
481 (5). <https://doi.org/10.1128/genomeA.01083-14>.
- 482 Coffin, Michael R. S., Jeff C. Clements, Luc A. Comeau, Thomas Guyondet, Michelle Maillet,  
483 Laura Steeves, Keryn Winterburn, et al. 2021. “The Killer within: Endogenous Bacteria  
484 Accelerate Oyster Mortality during Sustained Anoxia.” *Limnology and Oceanography* 66  
485 (7): 2885–2900. <https://doi.org/10.1002/lno.11798>.
- 486 Desriac, Florie, Patrick Le Chevalier, Benjamin Brillet, Ivan Leguerinel, Benoît Thuillier, Christine  
487 Paillard, and Yannick Fleury. 2014. “Exploring the Hologenome Concept in Marine

- 488 Bivalvia: Haemolymph Microbiota as a Pertinent Source of Probiotics for Aquaculture.”  
489 *FEMS Microbiology Letters* 350 (1): 107–16. <https://doi.org/10.1111/1574-6968.12308>.
- 490 Dickinson, Gary H., Anna V. Ivanina, Omera B. Matoo, Hans O. Pörtner, Gisela Lannig, Christian  
491 Bock, Elia Beniash, and Inna M. Sokolova. 2012. “Interactive Effects of Salinity and  
492 Elevated CO<sub>2</sub> Levels on Juvenile Eastern Oysters, *Crassostrea Virginica*.” *Journal of*  
493 *Experimental Biology* 215 (1): 29–43. <https://doi.org/10.1242/jeb.061481>.
- 494 Dinnel, Paul. 2016. “Restoration of the Native Oyster, *Ostrea Lurida*, in Fidalgo Bay, Padilla Bay  
495 and Cypress Island,” 56.
- 496 Dobretsov, Sergey, and Daniel Rittschof. 2020. “Love at First Taste: Induction of Larval  
497 Settlement by Marine Microbes.” *International Journal of Molecular Sciences* 21 (3):  
498 731. <https://doi.org/10.3390/ijms21030731>.
- 499 Dubé, Caroline Eve, Chin-Long Ky, and Serge Planes. 2019. “Microbiome of the Black-Lipped  
500 Pearl Oyster *Pinctada Margaritifera*, a Multi-Tissue Description With Functional  
501 Profiling.” *Frontiers in Microbiology* 10 (July): 1548.  
502 <https://doi.org/10.3389/fmicb.2019.01548>.
- 503 Elizabeth H. Silvy, Frances P. Gelwick, and Nova J. Silvy. 2020. “Factors Affecting Dermo Disease  
504 (*Perkinsus Marinus*) in Eastern Oysters (*Crassostrea Virginica*) in Galveston Bay, Texas.”  
505 *Journal of Environmental Science and Engineering A* 9 (6).  
506 <https://doi.org/10.17265/2162-5298/2020.06.003>.
- 507 Fedarko, Marcus W, Cameron Martino, James T Morton, Antonio González, Gibraan Rahman,  
508 Clarisse A Marotz, Jeremiah J Minich, Eric E Allen, and Rob Knight. 2020. “Visualizing  
509 ’omic Feature Rankings and Log-Ratios Using Qurro.” *NAR Genomics and Bioinformatics*  
510 2 (2): lqaa023. <https://doi.org/10.1093/nargab/lqaa023>.
- 511 Gonzalez, Antonio, Jose A. Navas-Molina, Tomasz Kosciolk, Daniel McDonald, Yoshiaki Vázquez-  
512 Baeza, Gail Ackermann, Jeff DeReus, et al. 2018. “Qiita: Rapid, Web-Enabled  
513 Microbiome Meta-Analysis.” *Nature Methods* 15 (10): 796–98.  
514 <https://doi.org/10.1038/s41592-018-0141-9>.
- 515 Jacqueline White, Jennifer L. Ruesink, and Alan C. Trimble. 2009. “The Nearly Forgotten Oyster:  
516 *Ostrea Lurida* Carpenter 1864 (Olympia Oyster) History and Management in Washington  
517 State.” *Journal of Shellfish Research* 28 (1): 43–49.  
518 <https://doi.org/10.2983/035.028.0109>.
- 519 Janssen, Stefan, Daniel McDonald, Antonio Gonzalez, Jose A. Navas-Molina, Lingjing Jiang,  
520 Zhenjiang Zech Xu, Kevin Winker, et al. 2018. “Phylogenetic Placement of Exact  
521 Amplicon Sequences Improves Associations with Clinical Information.” Edited by  
522 Nicholas Chia. *MSystems* 3 (3). <https://doi.org/10.1128/mSystems.00021-18>.
- 523 Keppel, Andrew G., Denise L. Breitburg, and Rebecca B. Burrell. 2016. “Effects of Co-Varying  
524 Diel-Cycling Hypoxia and PH on Growth in the Juvenile Eastern Oyster, *Crassostrea*  
525 *Virginica*.” Edited by Kay C. Vopel. *PLOS ONE* 11 (8): e0161088.  
526 <https://doi.org/10.1371/journal.pone.0161088>.
- 527 Khan, Bushra, Sandra M. Clinton, Timothy J. Hamp, James D. Oliver, and Amy H. Ringwood.  
528 2018. “Potential Impacts of Hypoxia and a Warming Ocean on Oyster Microbiomes.”  
529 *Marine Environmental Research* 139 (August): 27–34.  
530 <https://doi.org/10.1016/j.marenvres.2018.04.018>.
- 531 Kherad-Pajouh, Sara, and Olivier Renaud. 2015. “A General Permutation Approach for Analyzing



- 532 Repeated Measures ANOVA and Mixed-Model Designs.” *Statistical Papers* 56 (4): 947–  
533 67. <https://doi.org/10.1007/s00362-014-0617-3>.
- 534 King, Gary M., Craig Judd, Cheryl R. Kuske, and Conor Smith. 2012. “Analysis of Stomach and  
535 Gut Microbiomes of the Eastern Oyster (*Crassostrea Virginica*) from Coastal Louisiana,  
536 USA.” Edited by Josh Neufeld. *PLoS ONE* 7 (12): e51475.  
537 <https://doi.org/10.1371/journal.pone.0051475>.
- 538 King, William L., Cheryl Jenkins, Jeffrey Go, Nachshon Siboni, Justin R. Seymour, and Maurizio  
539 Labbate. 2019. “Characterisation of the Pacific Oyster Microbiome During a Summer  
540 Mortality Event.” *Microbial Ecology* 77 (2): 502–12. [https://doi.org/10.1007/s00248-  
541 018-1226-9](https://doi.org/10.1007/s00248-018-1226-9).
- 542 King, William L, Nachshon Siboni, Tim Kahlke, Michael Dove, Wayne O’Connor, Khandaker  
543 Rayhan Mahbub, Cheryl Jenkins, Justin R Seymour, and Maurizio Labbate. 2020.  
544 “Regional and Oyster Microenvironmental Scale Heterogeneity in the Pacific Oyster  
545 Bacterial Community.” *FEMS Microbiology Ecology* 96 (5): fiae054.  
546 <https://doi.org/10.1093/femsec/fiae054>.
- 547 King, William L., Nachshon Siboni, Nathan L. R. Williams, Tim Kahlke, Khue Viet Nguyen, Cheryl  
548 Jenkins, Michael Dove, Wayne O’Connor, Justin R. Seymour, and Maurizio Labbate.  
549 2019. “Variability in the Composition of Pacific Oyster Microbiomes Across Oyster  
550 Families Exhibiting Different Levels of Susceptibility to OsHV-1 Mvar Disease.” *Frontiers  
551 in Microbiology* 10 (March): 473. <https://doi.org/10.3389/fmicb.2019.00473>.
- 552 Lasa, Aide, Andrea di Cesare, Giovanni Tassistro, Alessio Borello, Stefano Gualdi, Dolores  
553 Furones, Noelia Carrasco, et al. 2019. “Dynamics of the Pacific Oyster Pathobiota during  
554 Mortality Episodes in Europe Assessed by 16S rRNA Gene Profiling and a New Target  
555 Enrichment Next-generation Sequencing Strategy.” *Environmental Microbiology* 21 (12):  
556 4548–62. <https://doi.org/10.1111/1462-2920.14750>.
- 557 Li, Zhen, and Leyi Wang. 2017. “Metagenomic 16S rRNA Sequencing Analysis of Pacific Oyster (  
558 *Crassostrea Gigas*) Microbiota from the Puget Sound Region in the United States.”  
559 *Genome Announcements* 5 (23). <https://doi.org/10.1128/genomeA.00468-17>.
- 560 Lokmer, Ana, M. Anouk Goedknecht, David W. Thielges, Dario Fiorentino, Sven Kuenzel, John F.  
561 Baines, and K. Mathias Wegner. 2016. “Spatial and Temporal Dynamics of Pacific Oyster  
562 Hemolymph Microbiota across Multiple Scales.” *Frontiers in Microbiology* 7 (August).  
563 <https://doi.org/10.3389/fmicb.2016.01367>.
- 564 Lokmer, Ana, Sven Kuenzel, John F. Baines, and Karl Mathias Wegner. 2016. “The Role of Tissue-  
565 Specific Microbiota in Initial Establishment Success of Pacific Oysters: Microbiota and  
566 Oyster Establishment.” *Environmental Microbiology* 18 (3): 970–87.  
567 <https://doi.org/10.1111/1462-2920.13163>.
- 568 Lokmer, Ana, and Karl Mathias Wegner. 2015. “Hemolymph Microbiome of Pacific Oysters in  
569 Response to Temperature, Temperature Stress and Infection.” *The ISME Journal* 9 (3):  
570 670–82. <https://doi.org/10.1038/ismej.2014.160>.
- 571 Lorgèril, Julien de, Aude Lucasson, Bruno Petton, Eve Toulza, Caroline Montagnani, Camille  
572 Clerissi, Jeremie Vidal-Dupiol, et al. 2018. “Immune-Suppression by OsHV-1 Viral  
573 Infection Causes Fatal Bacteraemia in Pacific Oysters.” *Nature Communications* 9 (1):  
574 4215. <https://doi.org/10.1038/s41467-018-06659-3>.
- 575 Lozupone, Catherine, Micah Hamady, and Rob Knight. 2006. “UniFrac – An Online Tool for

- 576 Comparing Microbial Community Diversity in a Phylogenetic Context.” *BMC*  
577 *Bioinformatics* 7 (1): 371. <https://doi.org/10.1186/1471-2105-7-371>.
- 578 Martino, Cameron, James T. Morton, Clarisse A. Marotz, Luke R. Thompson, Anupriya Tripathi,  
579 Rob Knight, and Karsten Zengler. 2019. “A Novel Sparse Compositional Technique  
580 Reveals Microbial Perturbations.” Edited by Josh D. Neufeld. *MSystems* 4 (1).  
581 <https://doi.org/10.1128/mSystems.00016-19>.
- 582 McDonald, Daniel, Yoshiki Vázquez-Baeza, David Koslicki, Jason McClelland, Nicolai Reeve,  
583 Zhenjiang Xu, Antonio Gonzalez, and Rob Knight. 2018. “Striped UniFrac: Enabling  
584 Microbiome Analysis at Unprecedented Scale.” *Nature Methods* 15 (11): 847–48.  
585 <https://doi.org/10.1038/s41592-018-0187-8>.
- 586 Minich, Jeremiah J, Jon G Sanders, Amnon Amir, Greg Humphrey, Jack A Gilbert, and Rob  
587 Knight. 2019. “Quantifying and Understanding Well-to-Well Contamination in  
588 Microbiome Research.” *MSystems* 4 (4): e00186-19.  
589 <https://doi.org/10.1128/mSystems.00186-19>.
- 590 Morton, James T., Clarisse Marotz, Alex Washburne, Justin Silverman, Livia S. Zaramela, Anna  
591 Edlund, Karsten Zengler, and Rob Knight. 2019. “Establishing Microbial Composition  
592 Measurement Standards with Reference Frames.” *Nature Communications* 10 (1): 2719.  
593 <https://doi.org/10.1038/s41467-019-10656-5>.
- 594 Nielsen, Shaun J., Tilmann Harder, and Peter D. Steinberg. 2015. “Sea Urchin Larvae Decipher  
595 the Epiphytic Bacterial Community Composition When Selecting Sites for Attachment  
596 and Metamorphosis.” *FEMS Microbiology Ecology* 91 (1): 1–9.  
597 <https://doi.org/10.1093/femsec/fiu011>.
- 598 Offret, Clément, Sauvann Paulino, Olivier Gauthier, Kevin Château, Adeline Bidault, Charlotte  
599 Corporeau, Philippe Miner, et al. 2020. “The Marine Intertidal Zone Shapes Oyster and  
600 Clam Digestive Bacterial Microbiota.” *FEMS Microbiology Ecology* 96 (8).  
601 <https://doi.org/10.1093/femsec/fiaa078>.
- 602 Ossai, Sylvia, Padmini Ramachandran, Andrea Ottesen, Elizabeth Reed, Angelo DePaola, and  
603 Salina Parveen. 2017. “Microbiomes of American Oysters ( *Crassostrea Virginica* )  
604 Harvested from Two Sites in the Chesapeake Bay.” *Genome Announcements* 5 (30).  
605 <https://doi.org/10.1128/genomeA.00729-17>.
- 606 Pathirana, Erandi, Marine Fuhrmann, Richard Whittington, and Paul Hick. 2019. “Influence of  
607 Environment on the Pathogenesis of Ostreid Herpesvirus-1 (OsHV-1) Infections in Pacific  
608 Oysters (*Crassostrea Gigas*) through Differential Microbiome Responses.” *Heliyon* 5 (7):  
609 e02101. <https://doi.org/10.1016/j.heliyon.2019.e02101>.
- 610 Peter-Contesse, Tristan, and Betsy Peabody. 2005. “Reestablishing Olympia Oyster Populations  
611 in Puget Sound, Washington.” Washington Sea Grant Program.
- 612 Pierce, Melissa L., and J. Evan Ward. 2018. “Microbial Ecology of the Bivalvia, with an Emphasis  
613 on the Family Ostreidae.” *Journal of Shellfish Research* 37 (4): 793–806.  
614 <https://doi.org/10.2983/035.037.0410>.
- 615 Pierce, Melissa L., and J. Evan Ward. 2019. “Gut Microbiomes of the Eastern Oyster ( *Crassostrea Virginica* )  
616 and the Blue Mussel ( *Mytilus Edulis* ): Temporal Variation and  
617 the Influence of Marine Aggregate-Associated Microbial Communities.” Edited by  
618 Katherine McMahon. *MSphere* 4 (6). <https://doi.org/10.1128/mSphere.00730-19>.
- 619 Pierce, Melissa L., J. Evan Ward, Bridget A. Holohan, Xiaowei Zhao, and Randall E. Hicks. 2016.

- 620 “The Influence of Site and Season on the Gut and Pallial Fluid Microbial Communities of  
621 the Eastern Oyster, *Crassostrea Virginica* (Bivalvia, Ostreidae): Community-Level  
622 Physiological Profiling and Genetic Structure.” *Hydrobiologia* 765 (1): 97–113.  
623 <https://doi.org/10.1007/s10750-015-2405-z>.
- 624 Pimentel, Zachary T., Keith Dufault-Thompson, Kayla T. Russo, Abigail K. Scro, Roxanna M.  
625 Smolowitz, Marta Gomez-Chiarri, and Ying Zhang. 2021. “Microbiome Analysis Reveals  
626 Diversity and Function of *Mollicutes* Associated with the Eastern Oyster, *Crassostrea*  
627 *Virginica*.” Edited by Barbara J. Campbell. *MSphere* 6 (3).  
628 <https://doi.org/10.1128/mSphere.00227-21>.
- 629 Quast, Christian, Elmar Pruesse, Pelin Yilmaz, Jan Gerken, Timmy Schweer, Pablo Yarza, Jörg  
630 Peplies, and Frank Oliver Glöckner. 2012. “The SILVA Ribosomal RNA Gene Database  
631 Project: Improved Data Processing and Web-Based Tools.” *Nucleic Acids Research* 41  
632 (D1): D590–96. <https://doi.org/10.1093/nar/gks1219>.
- 633 Scanes, Elliot, Laura M. Parker, Justin R. Seymour, Nachshon Siboni, William L. King, Nathan P.  
634 Danckert, K. Mathias Wegner, Michael C. Dove, Wayne A. O’Connor, and Pauline M.  
635 Ross. 2021. “Climate Change Alters the Haemolymph Microbiome of Oysters.” *Marine*  
636 *Pollution Bulletin* 164 (March): 111991.  
637 <https://doi.org/10.1016/j.marpolbul.2021.111991>.
- 638 Simons, Ariel Levi, Nathan Churches, and Sergey Nuzhdin. 2018. “High Turnover of Faecal  
639 Microbiome from Algal Feedstock Experimental Manipulations in the Pacific Oyster (  
640 *Crassostrea Gigas* ).” *Microbial Biotechnology* 11 (5): 848–58.  
641 <https://doi.org/10.1111/1751-7915.13277>.
- 642 Stevick, Rebecca J., Anton F. Post, and Marta Gómez-Chiarri. 2021. “Functional Plasticity in  
643 Oyster Gut Microbiomes along a Eutrophication Gradient in an Urbanized Estuary.”  
644 *Animal Microbiome* 3 (1): 5. <https://doi.org/10.1186/s42523-020-00066-0>.
- 645 Trabal, Natalia, José M. Mazón-Suástegui, Ricardo Vázquez-Juárez, Felipe Asencio-Valle, Enrique  
646 Morales-Bojórquez, and Jaime Romero. 2012. “Molecular Analysis of Bacterial  
647 Microbiota Associated with Oysters (*Crassostrea Gigas* and *Crassostrea Cortezensis*) in  
648 Different Growth Phases at Two Cultivation Sites.” *Microbial Ecology* 64 (2): 555–69.  
649 <https://doi.org/10.1007/s00248-012-0039-5>.
- 650 Wang, Chong, Wei-Yang Bao, Zhong-Qi Gu, Yi-Feng Li, Xiao Liang, Yun Ling, Sheng-Li Cai, He-  
651 Ding Shen, and Jin-Long Yang. 2012. “Larval Settlement and Metamorphosis of the  
652 Mussel *Mytilus Coruscus* in Response to Natural Biofilms.” *Biofouling* 28 (3): 249–56.  
653 <https://doi.org/10.1080/08927014.2012.671303>.
- 654 Wegner, Karl, Nils Volkenborn, Hannes Peter, and Alexander Eiler. 2013. “Disturbance Induced  
655 Decoupling between Host Genetics and Composition of the Associated Microbiome.”  
656 *BMC Microbiology* 13 (1): 252. <https://doi.org/10.1186/1471-2180-13-252>.
- 657 Yilmaz, Pelin, Laura Wegener Parfrey, Pablo Yarza, Jan Gerken, Elmar Pruesse, Christian Quast,  
658 Timmy Schweer, Jörg Peplies, Wolfgang Ludwig, and Frank Oliver Glöckner. 2014. “The  
659 SILVA and ‘All-Species Living Tree Project (LTP)’ Taxonomic Frameworks.” *Nucleic Acids*  
660 *Research* 42 (D1): D643–48. <https://doi.org/10.1093/nar/gkt1209>.
- 661  
662  
663

664 *Figure Legends*

665 **Figure 1.** Overview of study site characteristics. (Panel A) Juvenile oyster survival rates across  
666 four field sites in Washington State, USA (20 oysters initially deployed at each site). (Panel B)  
667 Temperature and Dissolved Oxygen measurements at each site, for both habitats, plotted over  
668 the 24-hour period prior to sampling.

669  
670 **Figure 2.** Alpha (Panel A) and beta (Panel B) diversity across sample types: seawater, sediment,  
671 oyster gut and shell biofilm. (Panel A) Shannon Diversity Index used to calculate alpha diversity  
672 by sample type. (Panel B) RPCA metric used to calculate dissimilarity matrix and define top  
673 explanatory axes.

674  
675 **Figure 3.** Taxonomic composition assigned by comparison to the Silva database to identify  
676 bacterial groups across sample types. (A) Heat map comparing relative abundances of taxa  
677 across sample types. The scale assigns a positive number to taxa which comprise a large  
678 majority of their sample composition while negative numbers are assigned to taxa which  
679 comprise a minority of the sample or are completely absent. Abundances are not absolute, but  
680 rather the relative percentage unique to each sample showing patterns in the over or under  
681 representation of key taxa. (B) Taxa bar plot displaying relative abundances of major bacterial  
682 groups within oyster gut samples. The bar plot is separated by study sites after finding  
683 significant differences in the beta diversity of gut samples between different sites.

684  
685 **Figure 4.** Variance in the oyster gut microbiota between sites. (Left) RPCA plot with only oyster  
686 gut samples. The dots are color coded by geographic location (site) within the Puget Sound and  
687 the arrows are colored by groups of bacterial ASVs found across samples which drive separation  
688 of that site. The RPCA biplot displays arrows which demonstrate the top 8 features associated  
689 with dissimilarity between samples. The visual association of these arrows with specific study  
690 sites informed the taxonomic groups to use for the differential abundance analysis ratios  
691 displayed in the box plot on the right. (Right) Ratio of differential abundances generated by  
692 Songbird analysis with *Vibrio*, Verrucomicrobiales and *Synechococcus* aligned ASVs as the  
693 numerator and *Mycoplasma* and Desulfocapsaceae aligned ASVs as the denominator.

**A**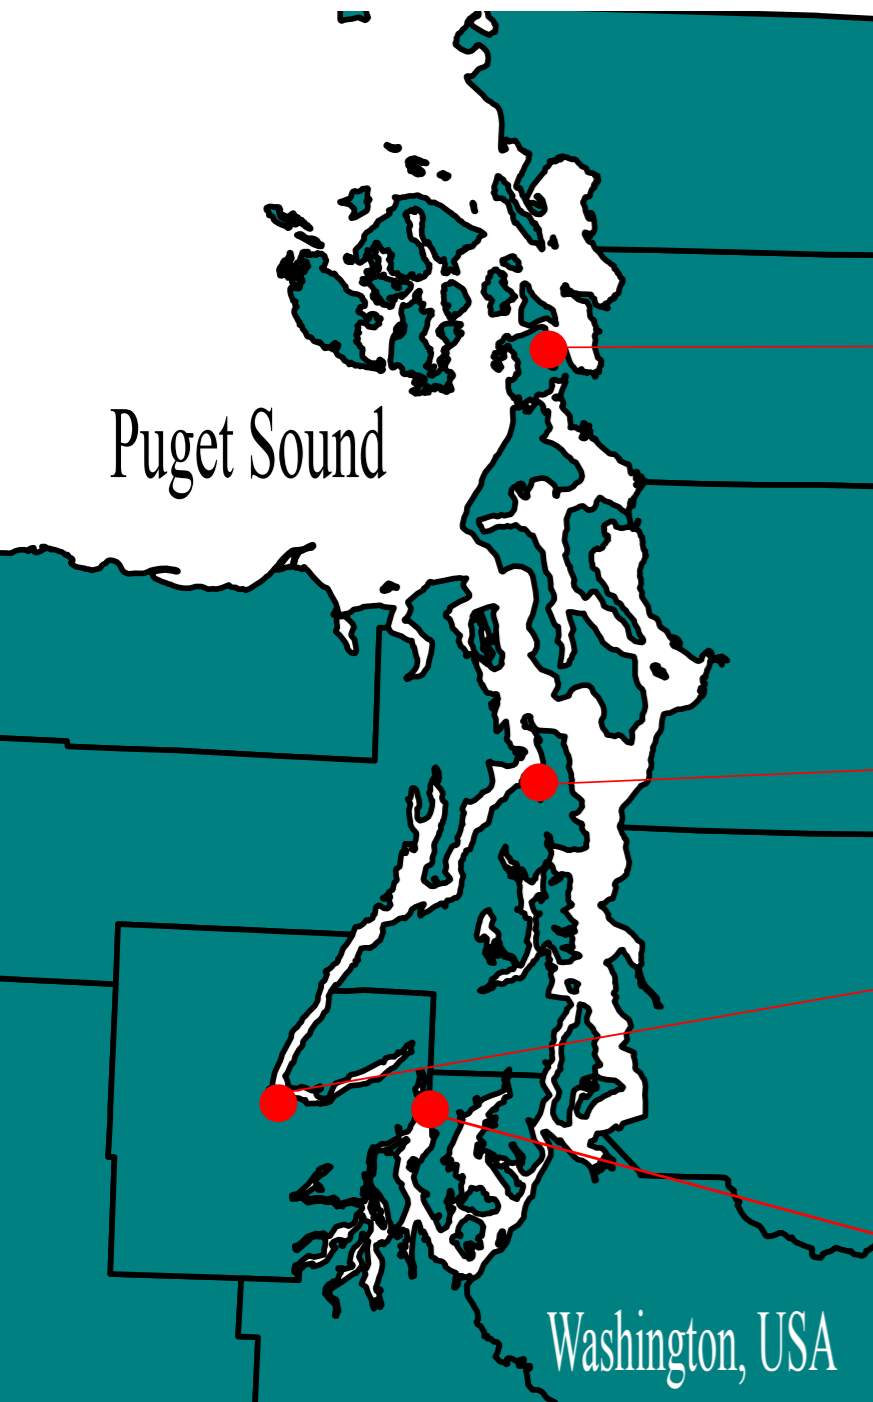

*Site Names*  
 (% survival, sample size)

*Fidalgo Bay*  
 (85%,  $n = 17$ )

*Port Gamble*  
 (55%,  $n = 11$ )

*Skokomish*  
 (60%,  $n = 12$ )

*Case Inlet*  
 (90%,  $n = 18$ )

**B**

CI.Bare    FB.Bare    PG.Bare    SK.Bare  
 CI.Eelgrass    FB.Eelgrass    PG.Eelgrass    SK.Eelgrass

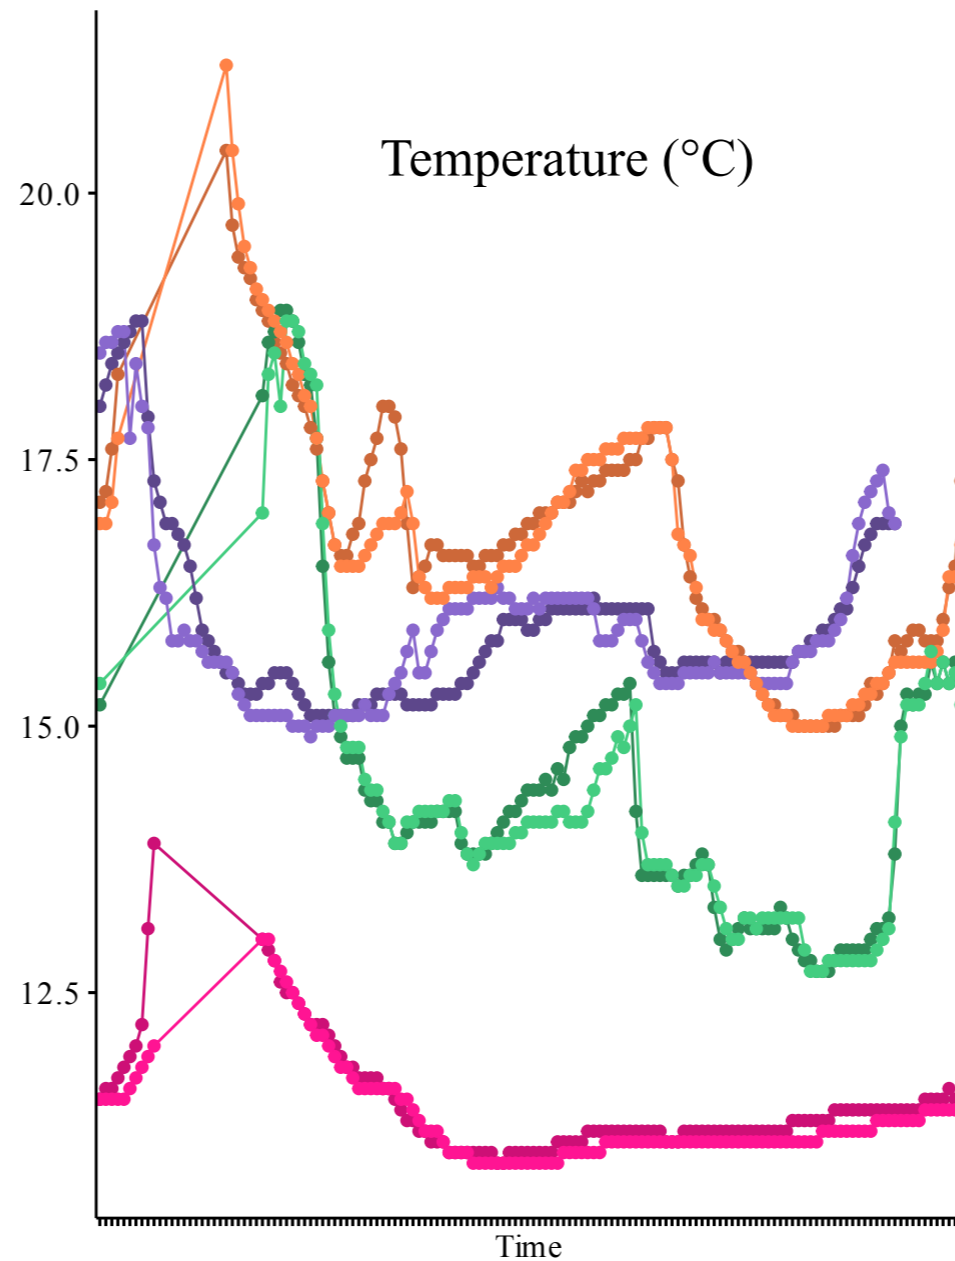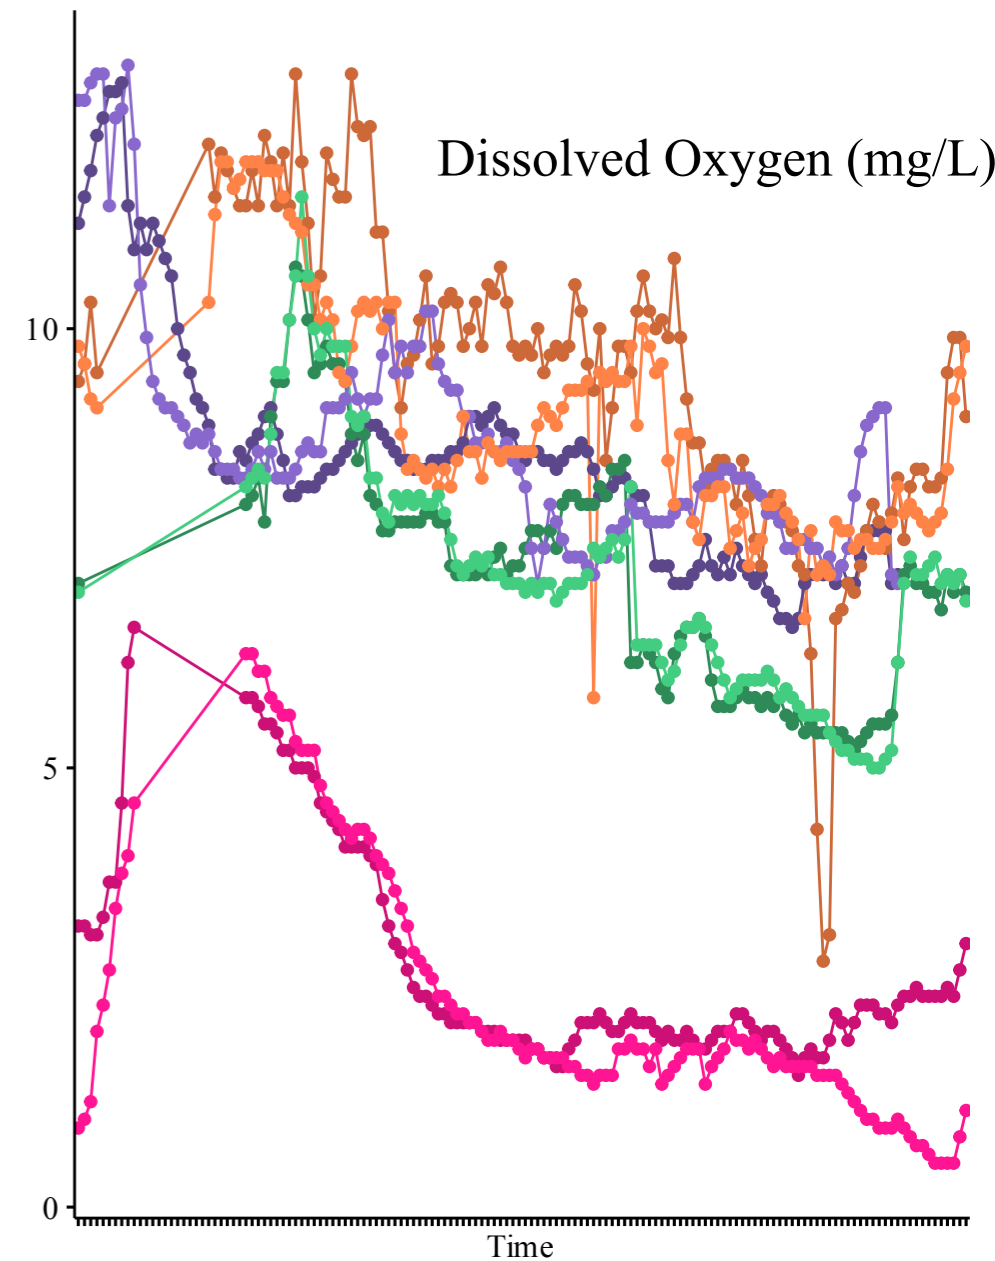



**Figure 1.** Overview of study site characteristics. (Panel A) Juvenile oyster survival rates across four field sites in Washington State, USA (20 oysters initially deployed at each site). (Panel B) Temperature and Dissolved Oxygen measurements at each site, for both habitats, plotted over the 24-hour period prior to sampling.

A

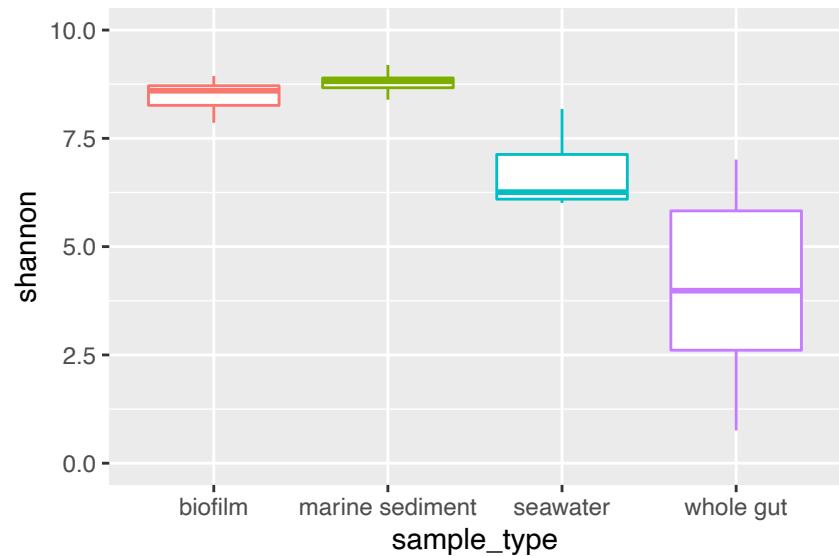

sample\_type

shell biofilm n = 23

marine sediment n = 24

seawater n = 21

whole gut n = 49

 $p = 1.77 \times 10^{-20}$ 

B

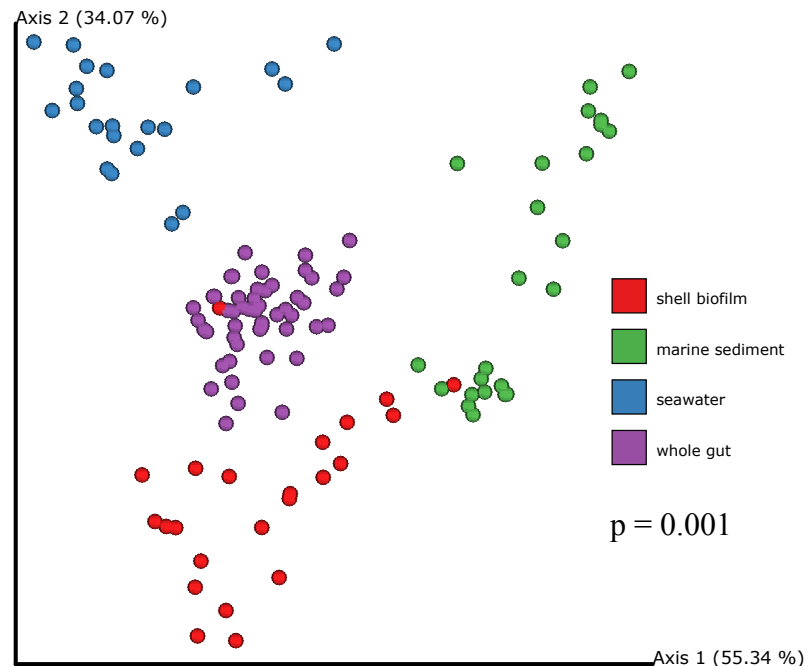

shell biofilm

marine sediment

seawater

whole gut

 $p = 0.001$ 

Axis 1 (55.34 %)

**Figure 2.** Alpha (Panel A) and beta (Panel B) diversity across sample types: seawater, sediment, oyster gut and shell biofilm. (Panel A) Shannon Diversity Index used to calculate alpha diversity by sample type. (Panel B) RPCA metric used to calculate dissimilarity matrix and define top explanatory axes.

A

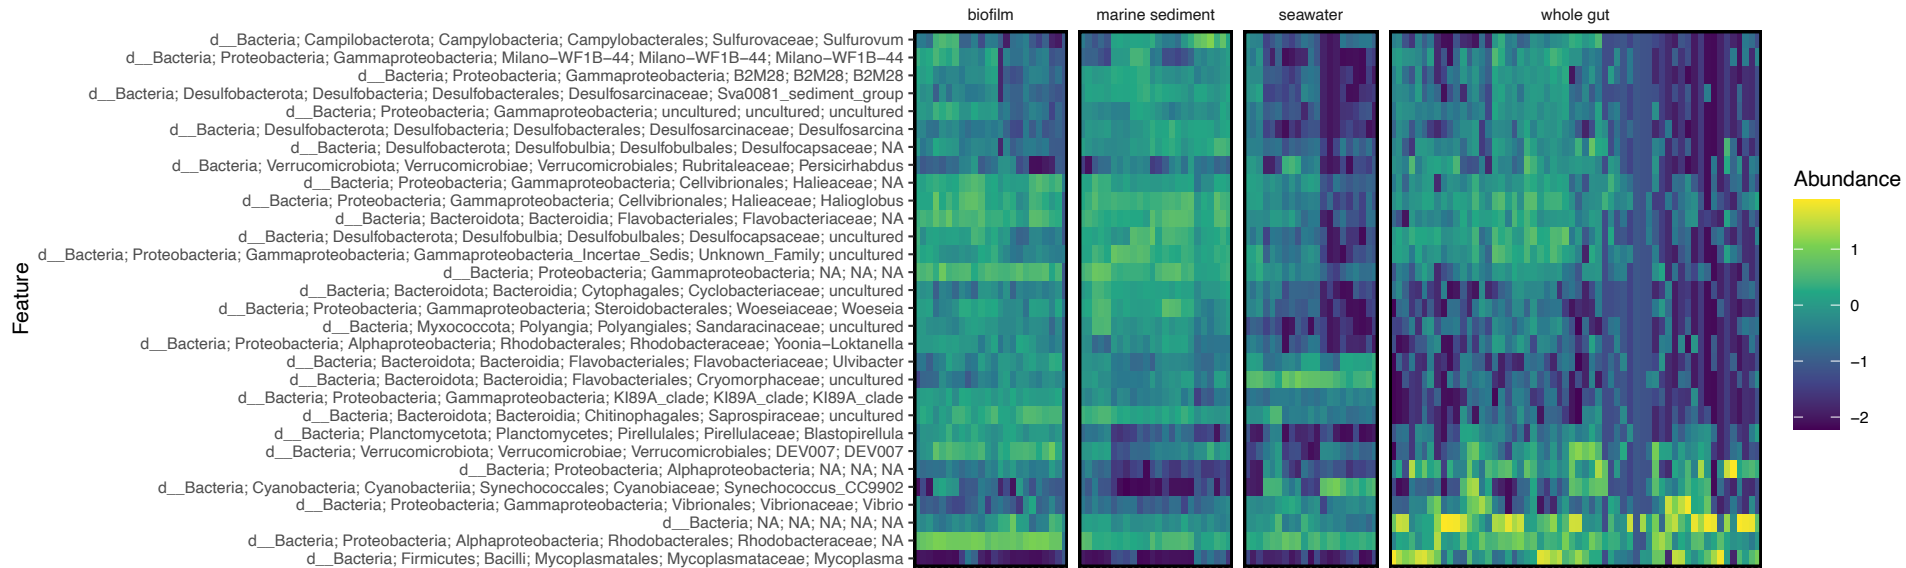

B

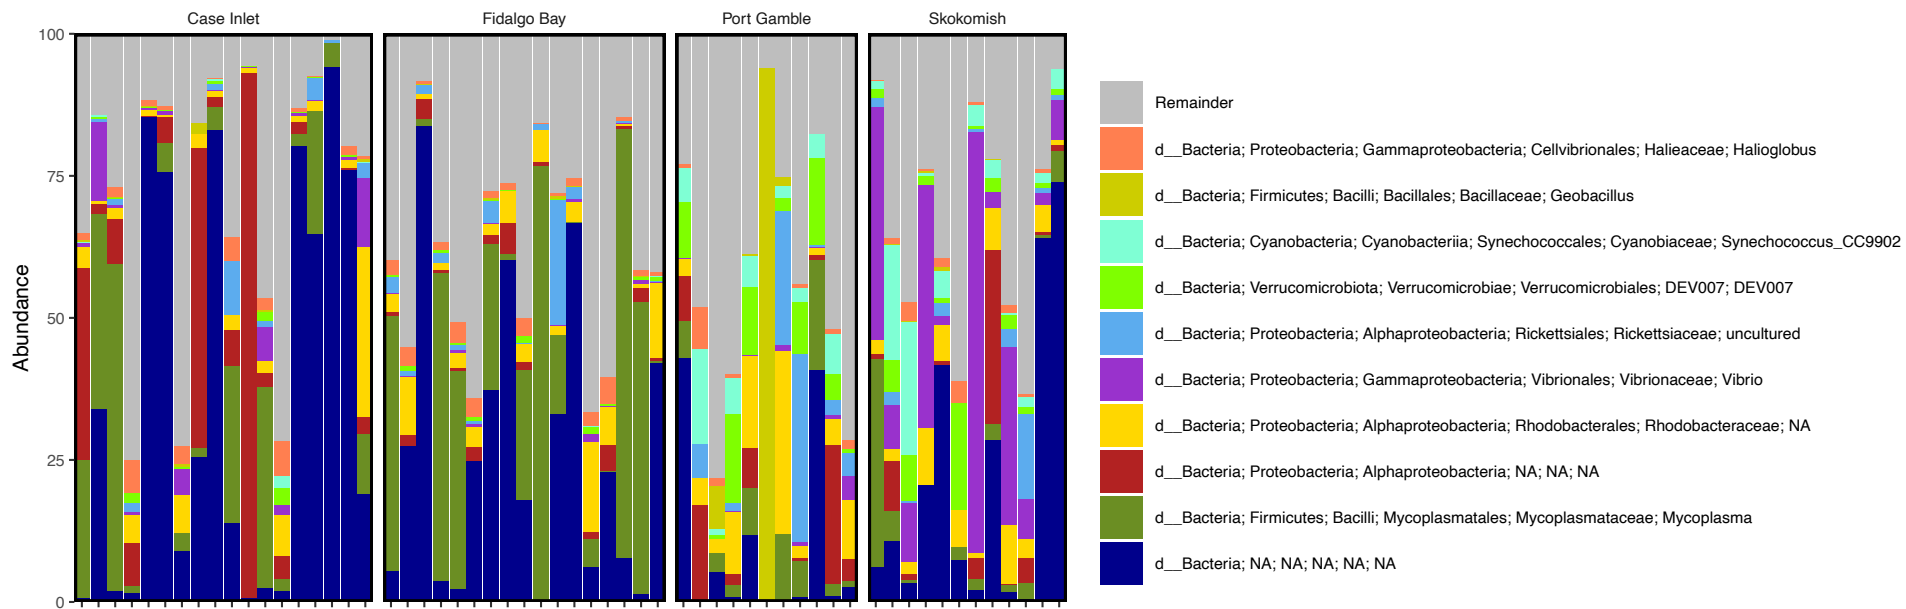

**Figure 3.** Taxonomic composition assigned by comparison to the Silva database to identify bacterial groups across sample types. (A) Heat map comparing relative abundances of taxa across sample types. The scale assigns a positive number to taxa which comprise a large majority of their sample composition while negative numbers are assigned to taxa which comprise a minority of the sample or are completely absent. Abundances are not absolute, but rather the relative percentage unique to each sample showing patterns in the over or under representation of key taxa. (B) Taxa bar plot displaying relative abundances of major bacterial groups within oyster gut samples. The bar plot is separated by study sites after finding significant differences in the beta diversity of gut samples between different sites.



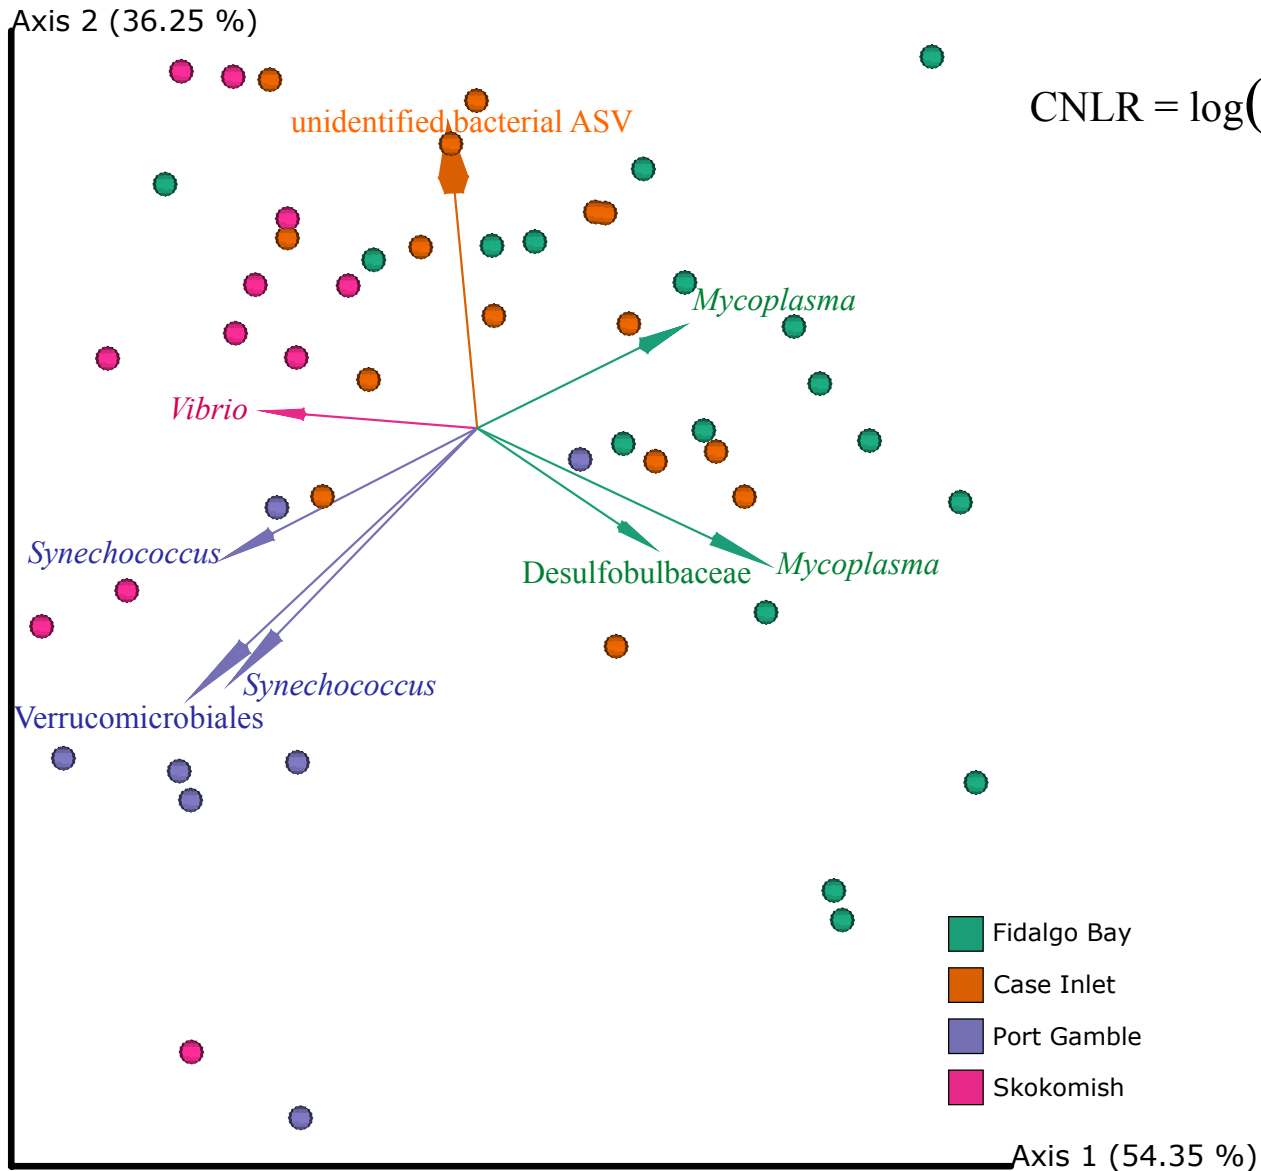

$$\text{CNLR} = \log\left(\frac{\textit{Vibrio} + \textit{Verrucomicrobiales} + \textit{Synechococcus}}{\textit{Mycoplasma} + \textit{Desulfocapsaceae}}\right)$$

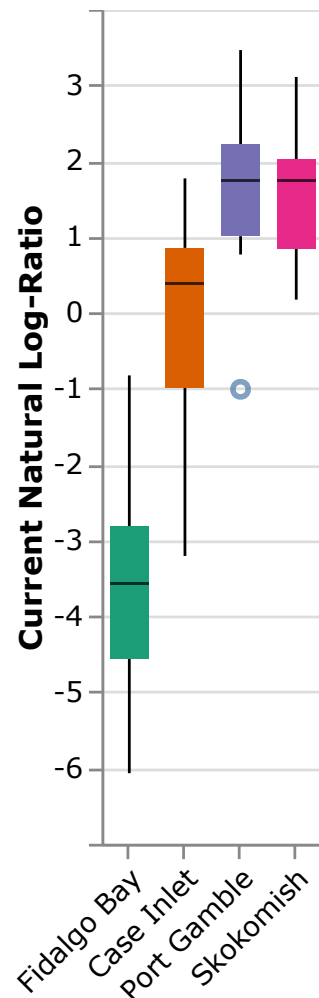

**Figure 4.** Variance in the oyster gut microbiota between sites. (Left) RPCA plot with only oyster gut samples. The dots are color coded by geographic location (site) within the Puget Sound and the arrows are colored by groups of bacterial ASVs found across samples which drive separation of that site. The RPCA biplot displays arrows which demonstrate the top 8 features associated with dissimilarity between samples. The visual association of these arrows with specific study sites informed the taxonomic groups to use for the differential abundance analysis ratios displayed in the box plot on the right. (Right) Ratio of differential abundances generated by Songbird analysis with *Vibrio*, Verrucomicrobiales and *Synechococcus* aligned ASVs as the numerator and *Mycoplasma* and Desulfocapsaceae aligned ASVs as the denominator.
